# Supplementary material for: Quantitative analysis of tumour spheroid structure
Source: eLife journal article supplement (doi:10.7554/elife.73020), 2021-11-29
Supplement: supp [file elife-73020-supp-v1.zip]

Archive with 4 entries (4 files):
- elife_poa_e73020_Supplementary_file_1.docx
- elife_poa_e73020_Supplementary_file_2.pdf
- elife_poa_e73020_Supplementary_file_3.pdf
- elife_poa_e73020_Transparent_Reporting_File.docx
