# Supplementary material for: Quantitative analysis of tumour spheroid structure
Source: eLife journal article supplement (doi:10.7554/elife.73020), 2021-11-29
Supplement: supp [file elife-73020-supp-v1.zip › elife_poa_e73020_Supplementary_file_2.pdf]

## Supplementary file 2

**Subset of spheroid cross-sectional confocal images.** We collect data on enough spheroids to ensure at least 10 for each initial seeding density and observation day (20 for comparing steady-state structure) are available. We then randomly subsample to ensure a consistent number of spheroids are analysed for each initial seeding density and observation day. In Fig. 1 to Fig. 6 we show a random subset of 10 spheroids from the complete data set for each condition, from days 7 to day 21 (WM983b) and day 24 (WM793b). Raw data (complete and the subset) are available on GitHub\*.

### WM983b (seeded with 2500 cells)

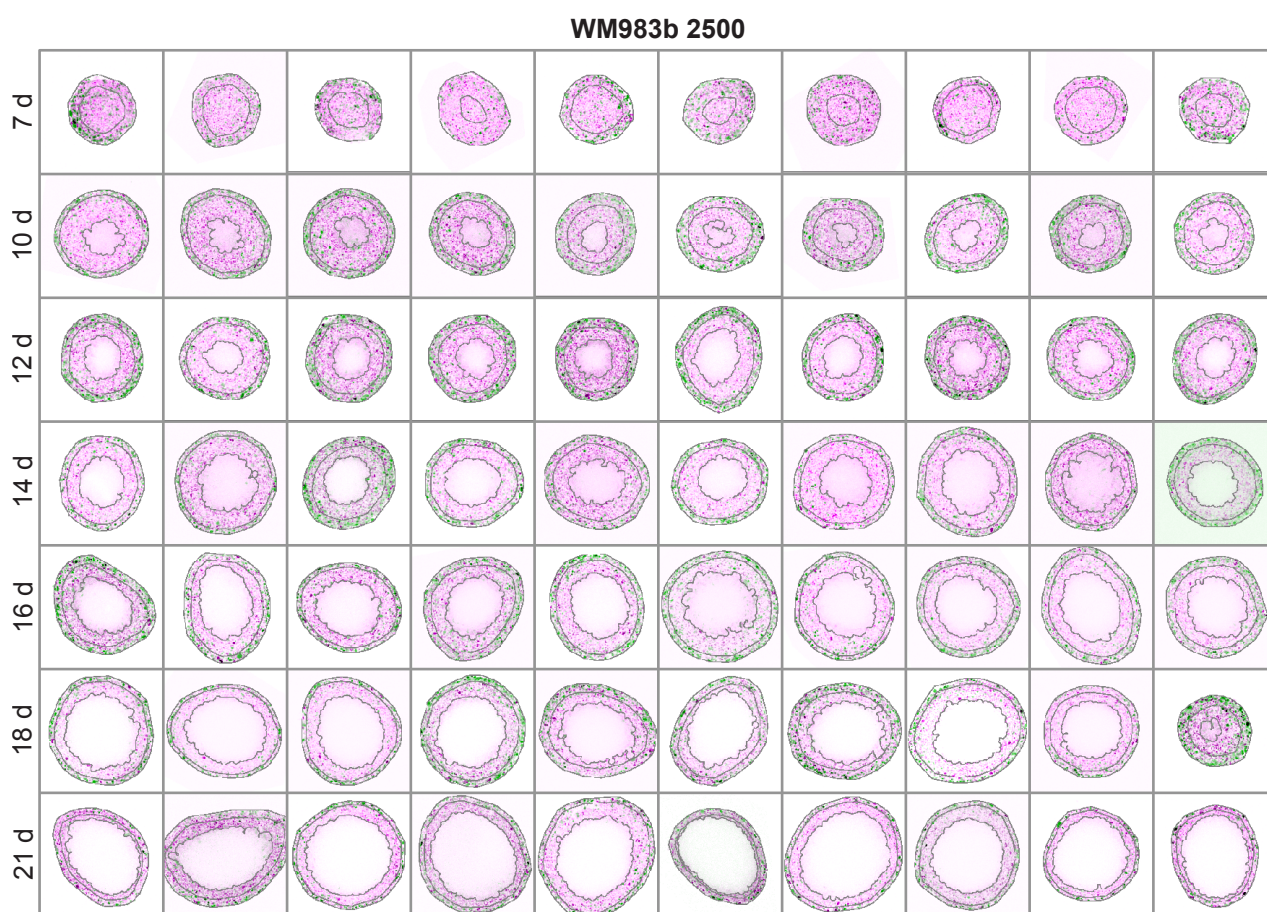

Figure 1

\*[github.com/ap-browning/Spheroids](https://github.com/ap-browning/Spheroids)

WM983b (seeded with 5000 cells)

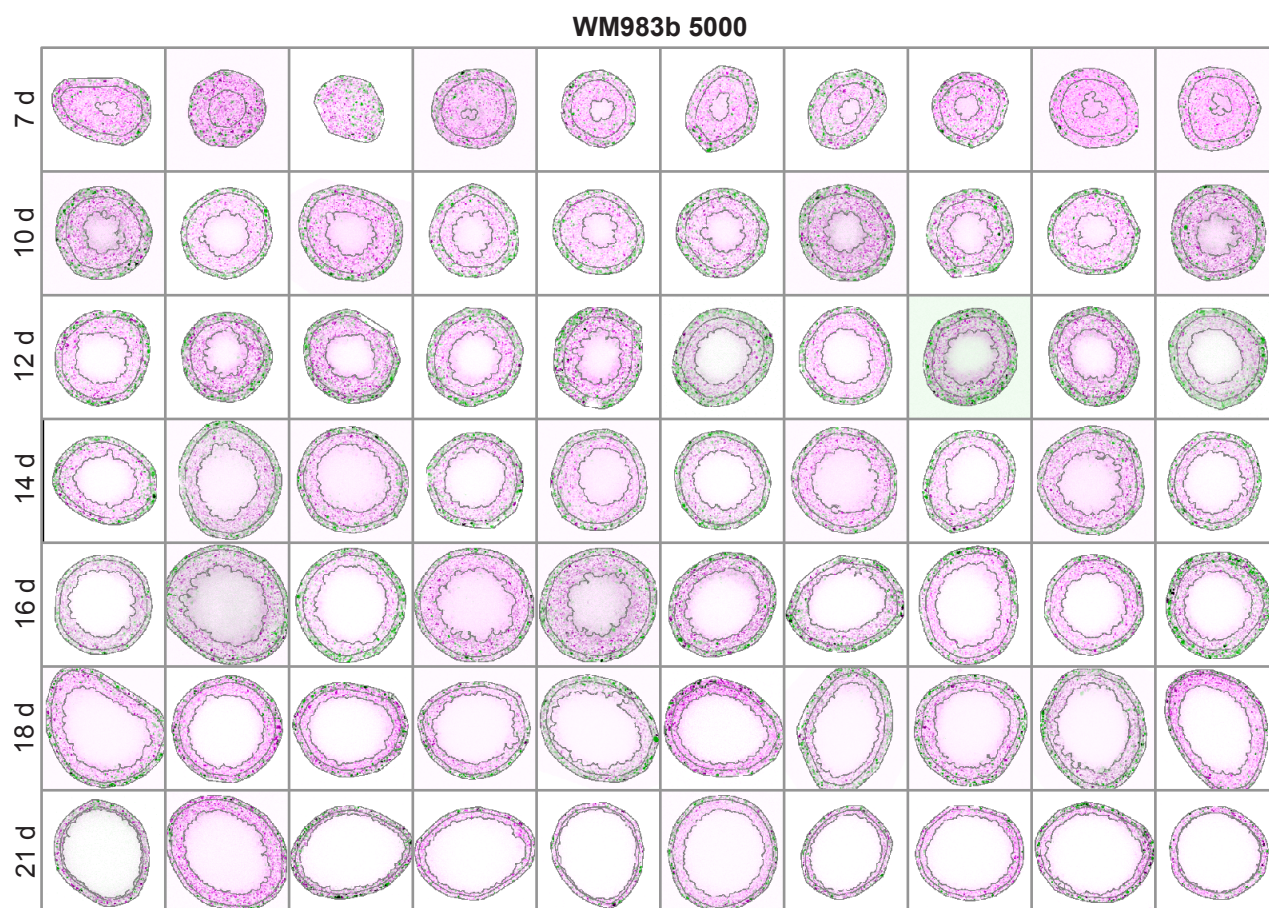

Figure 2

WM983b (seeded with 10000 cells)

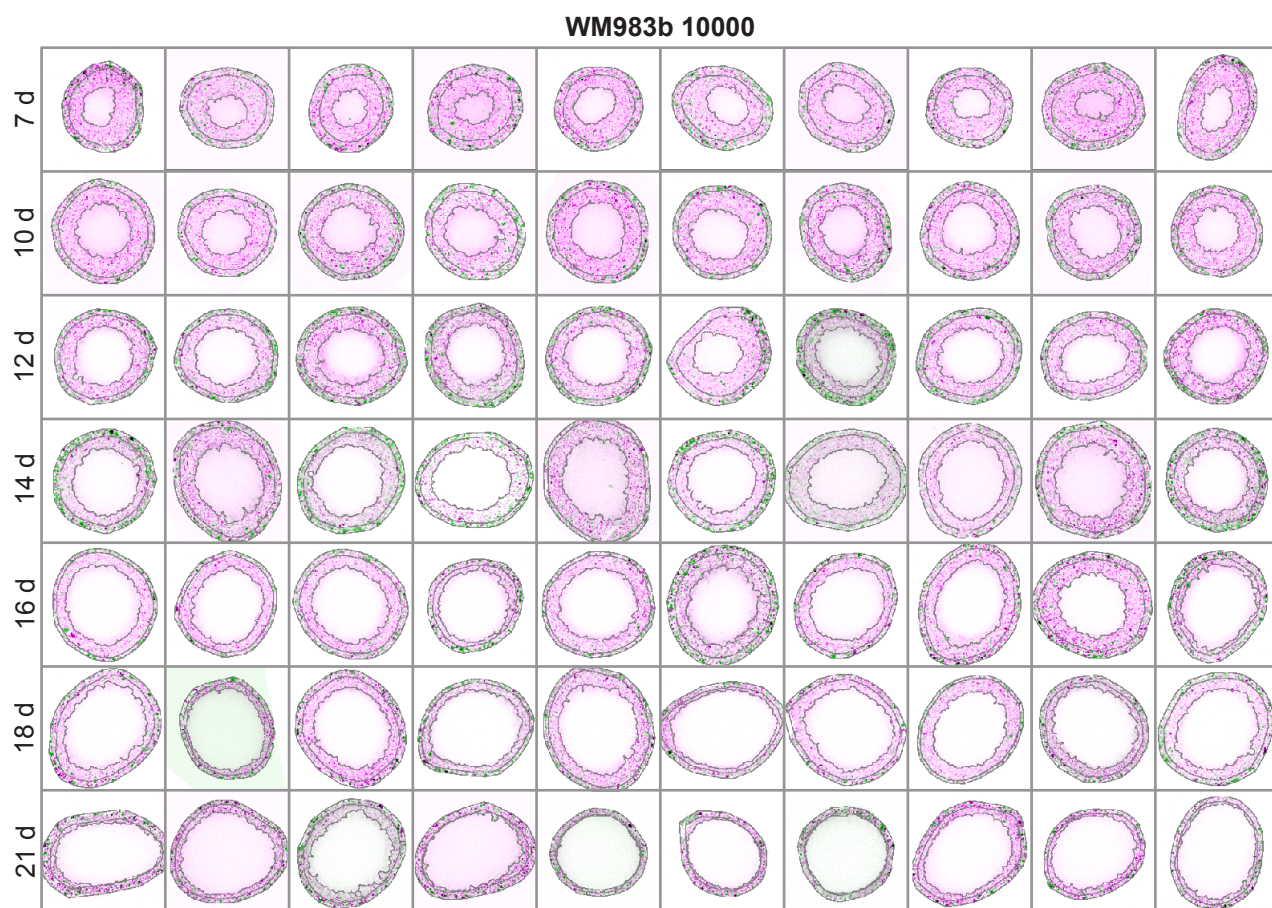

Figure 3

WM793b (seeded with 2500 cells)

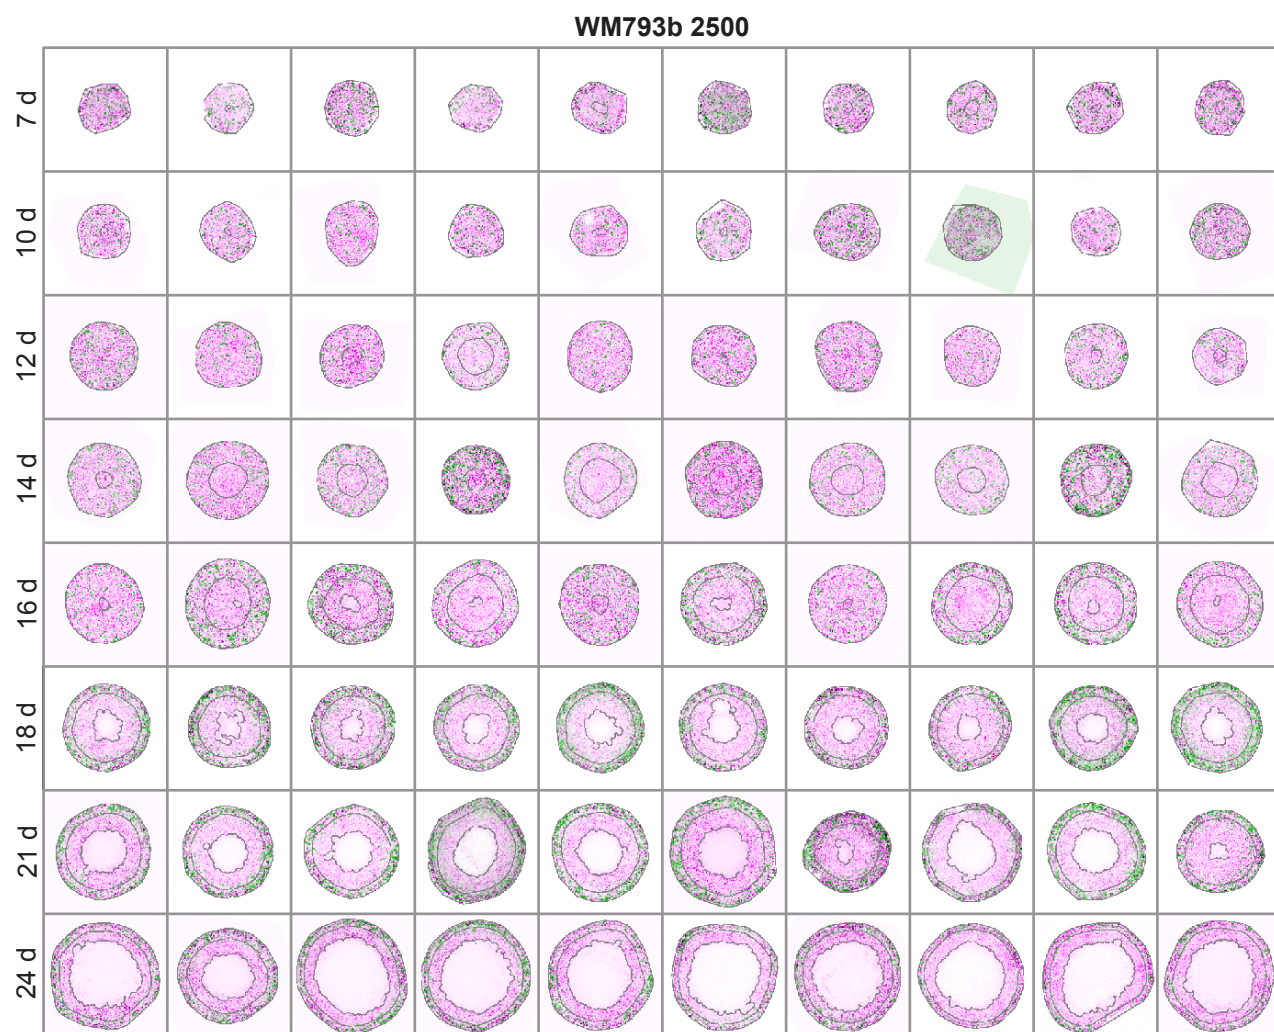

Figure 4

WM793b (seeded with 5000 cells)

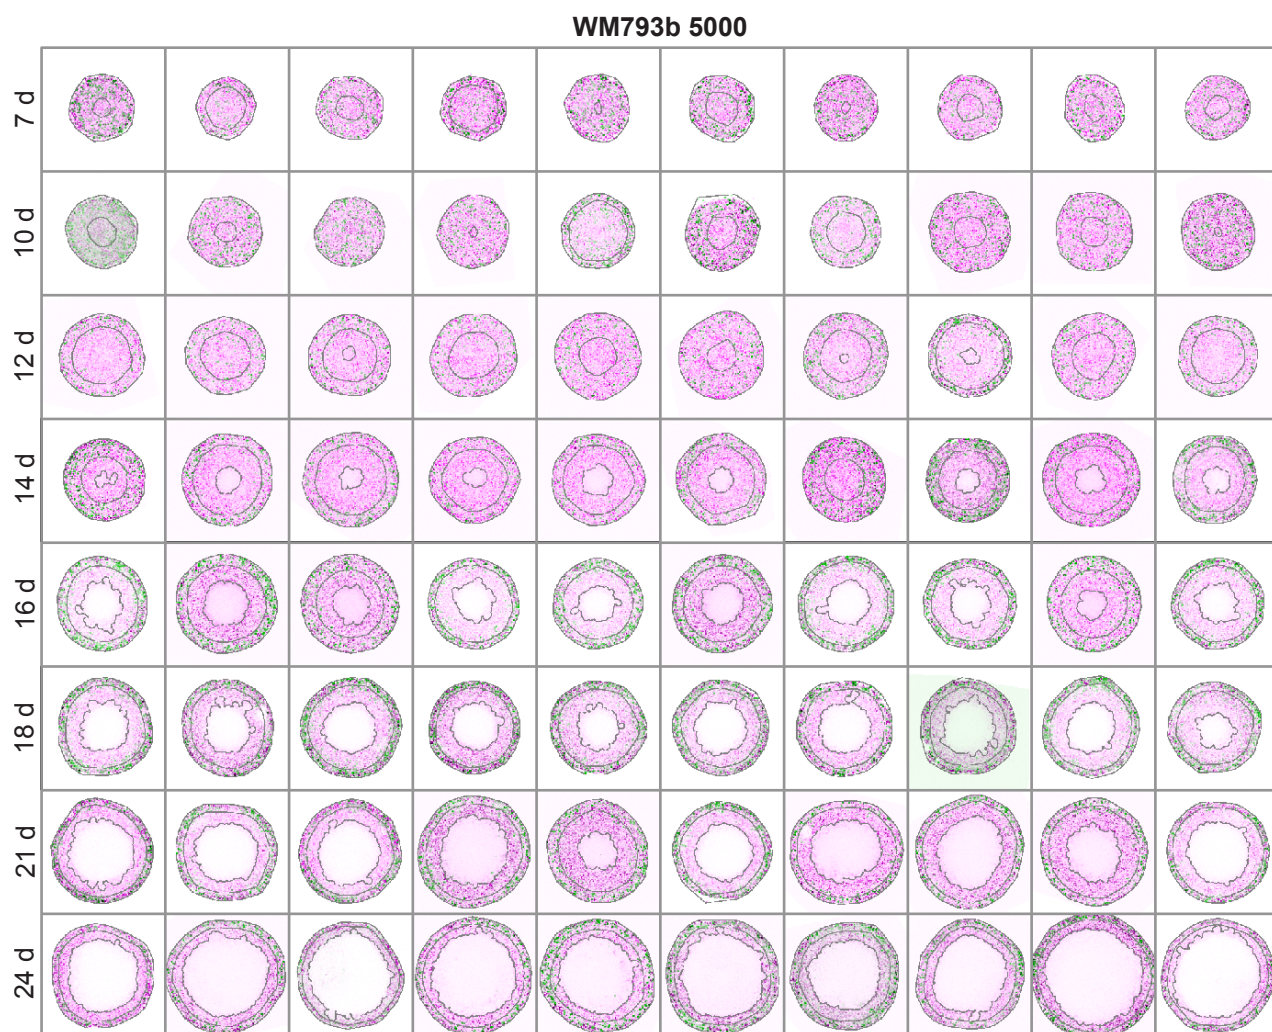

Figure 5

WM793b (seeded with 10000 cells)

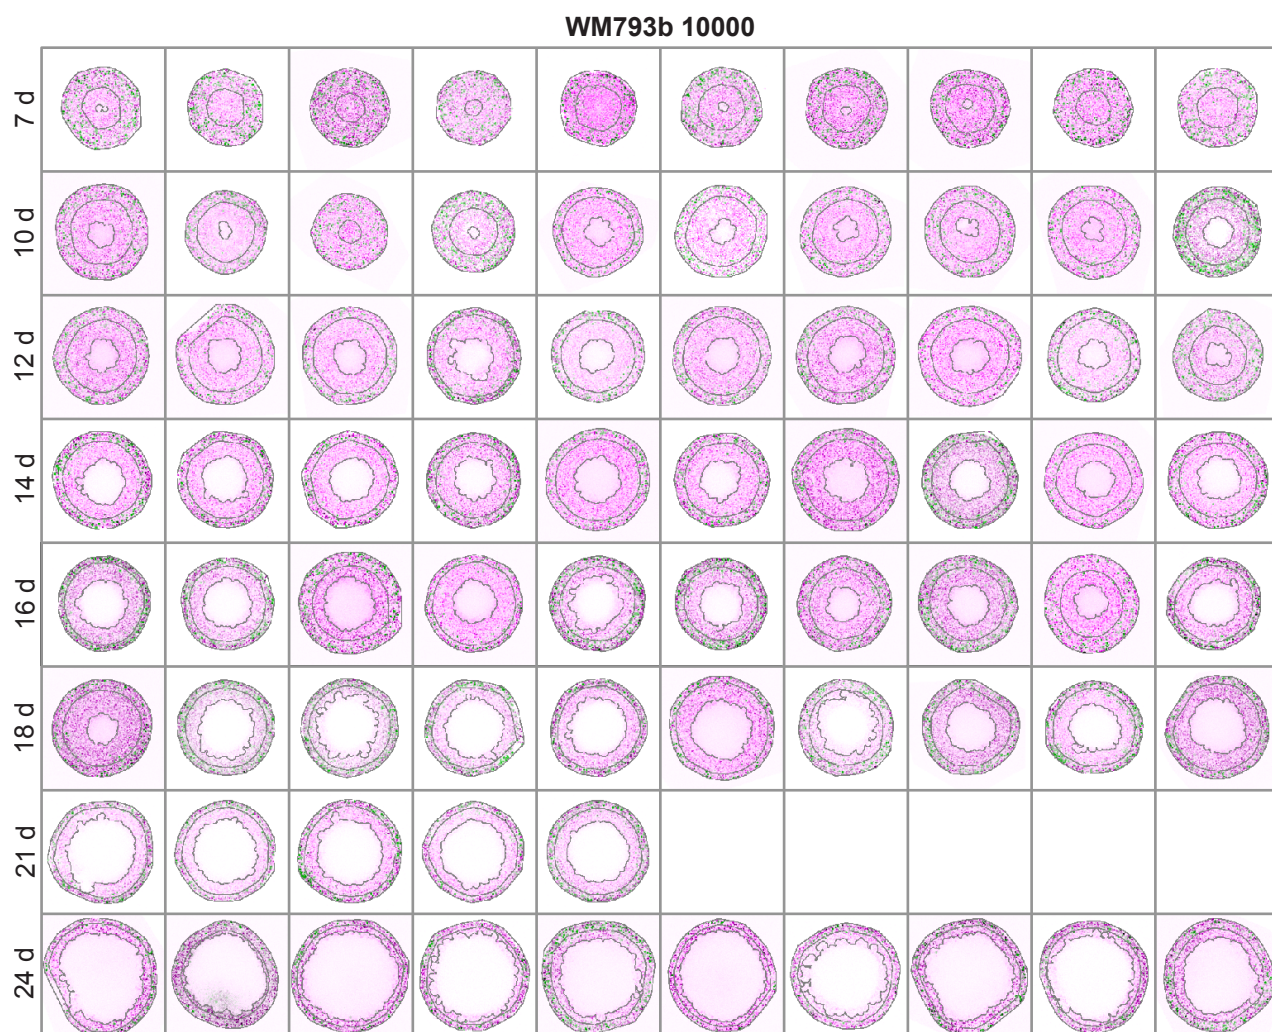

Figure 6
