# Supplementary material for: Quantitative analysis of tumour spheroid structure
Source: eLife journal article supplement (doi:10.7554/elife.73020), 2021-11-29
Supplement: supp [file elife-73020-supp-v1.zip › elife_poa_e73020_Supplementary_file_3.pdf]

## Supplementary file 3

**Steady-state analysis for WM983b cells using day 21 data.** In the main document, steady-state results in Figure 5 are produced by comparing data at day 21 (spheroids seeded with 2500 cells) to day 18 (spheroids seeded with 5000 and 10000 cells). Here, we reproduce the steady-state results in Figure 5 using data from day 21 from all initial seeding densities. However, we note that between days 18 and 21 spheroids seeded with 5000 and 10000 cells are observed to enter a fourth phase of decay, which is not captured by the mathematical model.

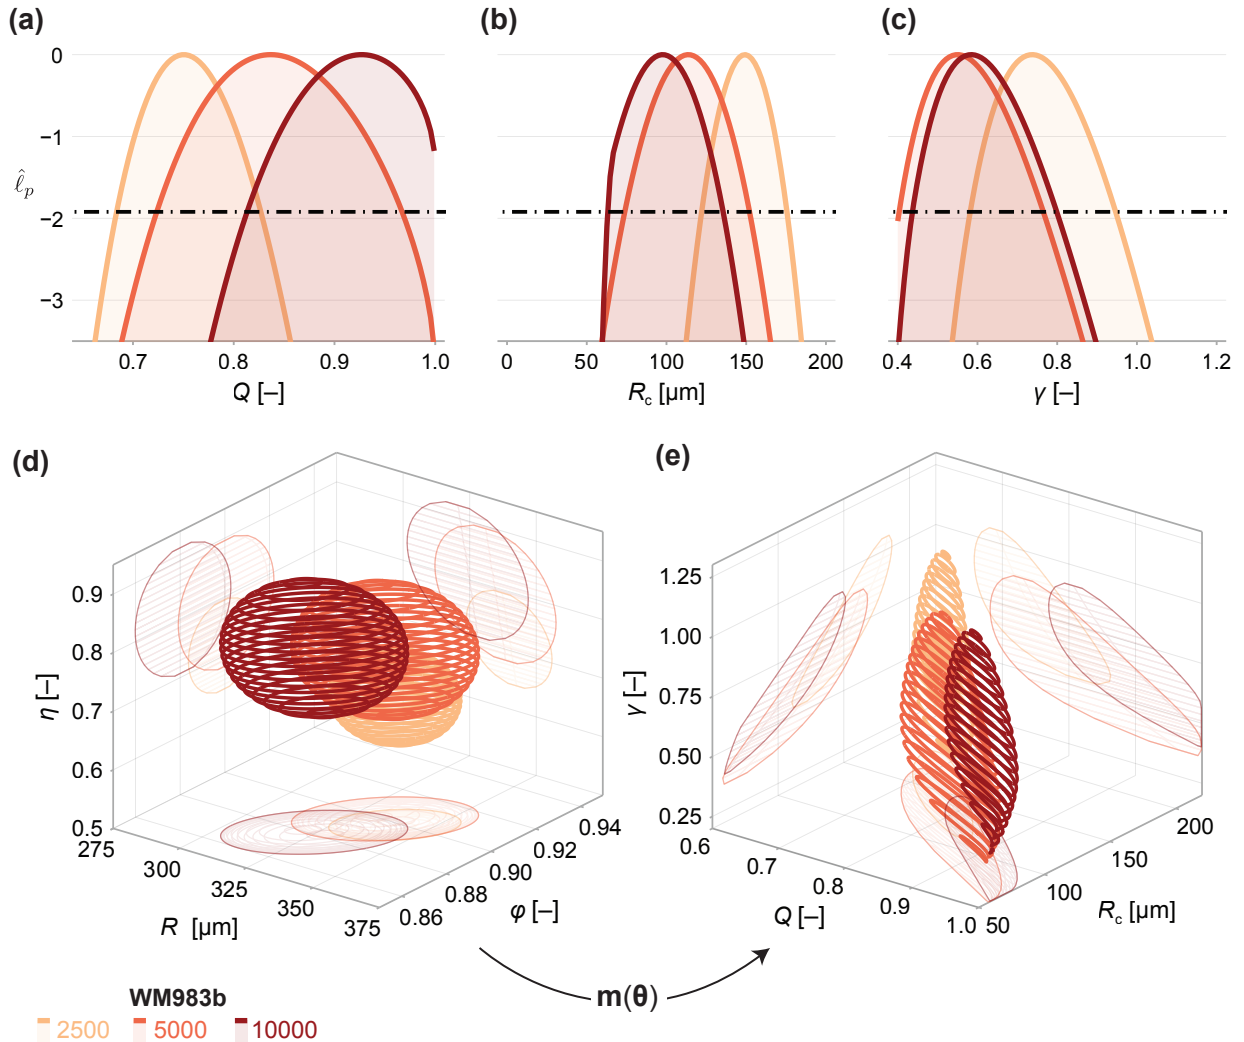

**Figure 1.** Comparison of WM983b spheroids between each initial seeding density at day 21. (a-c) Profile likelihoods for each parameter. (d) 95% confidence region for the full parameter space. 95% confidence regions for (d) the mean of each observation at steady state ( $\bar{R}$ ,  $\bar{\phi}$ ,  $\bar{\eta}$ ) and (e) the model parameters ( $Q$ ,  $R_c$ ,  $\gamma$ ).
